# Supplementary material for: Localized force application reveals mechanically sensitive domains of Piezo1
Source: PubMed Central journal article supplement (PMC5063965; doi:10.1038/ncomms12939), 2016-10-03
Supplement: ncomms12939-s1.pdf [file ncomms12939-s1.pdf]

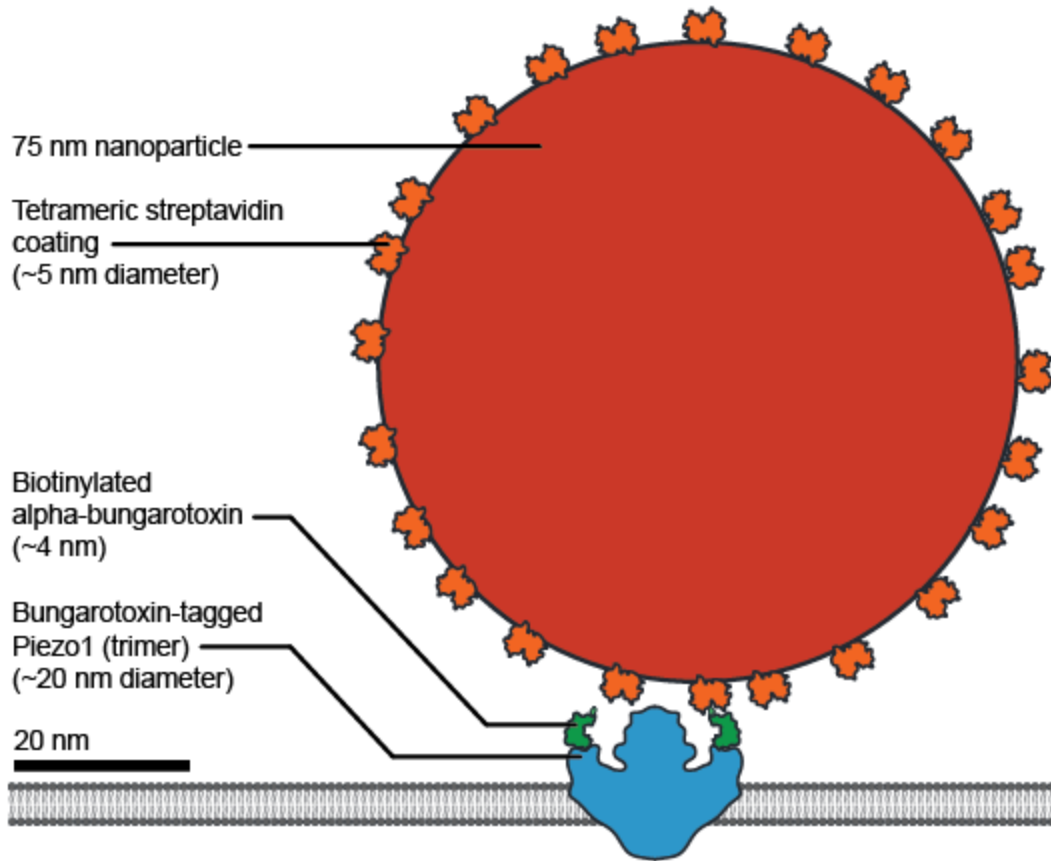

**Supplementary Figure 1. Scale diagram of BBS-Piezo1 binding complex.** Diagram depicting to-scale relationships of BBS-Piezo1, biotinylated bungarotoxin, and streptavidin-coated nanoparticle in complex.

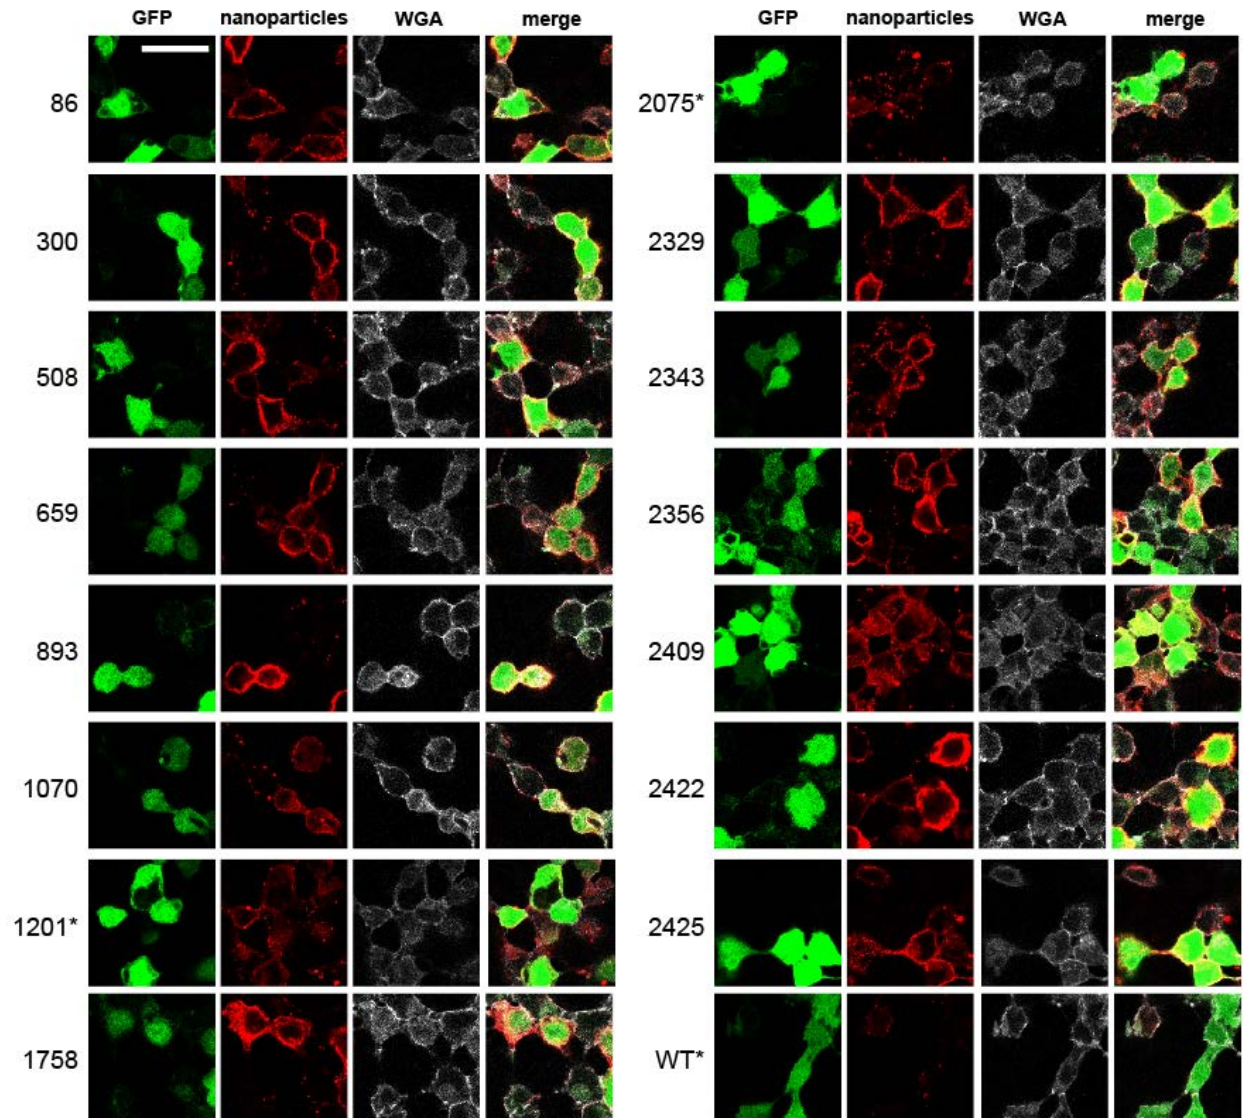

**Supplementary Figure 2. Specificity of nanoparticle labeling.** Representative images of HEK293T cells expressing Piezo1-BBS constructs, live-labeled with streptavidin-coated nanoparticles, immunostained against streptavidin, and WGA labeled for membrane localization (\*, insignificant labeling; green, GFP; red, anti-streptavidin; gray, WGA). Scale bar is 30  $\mu$ m.

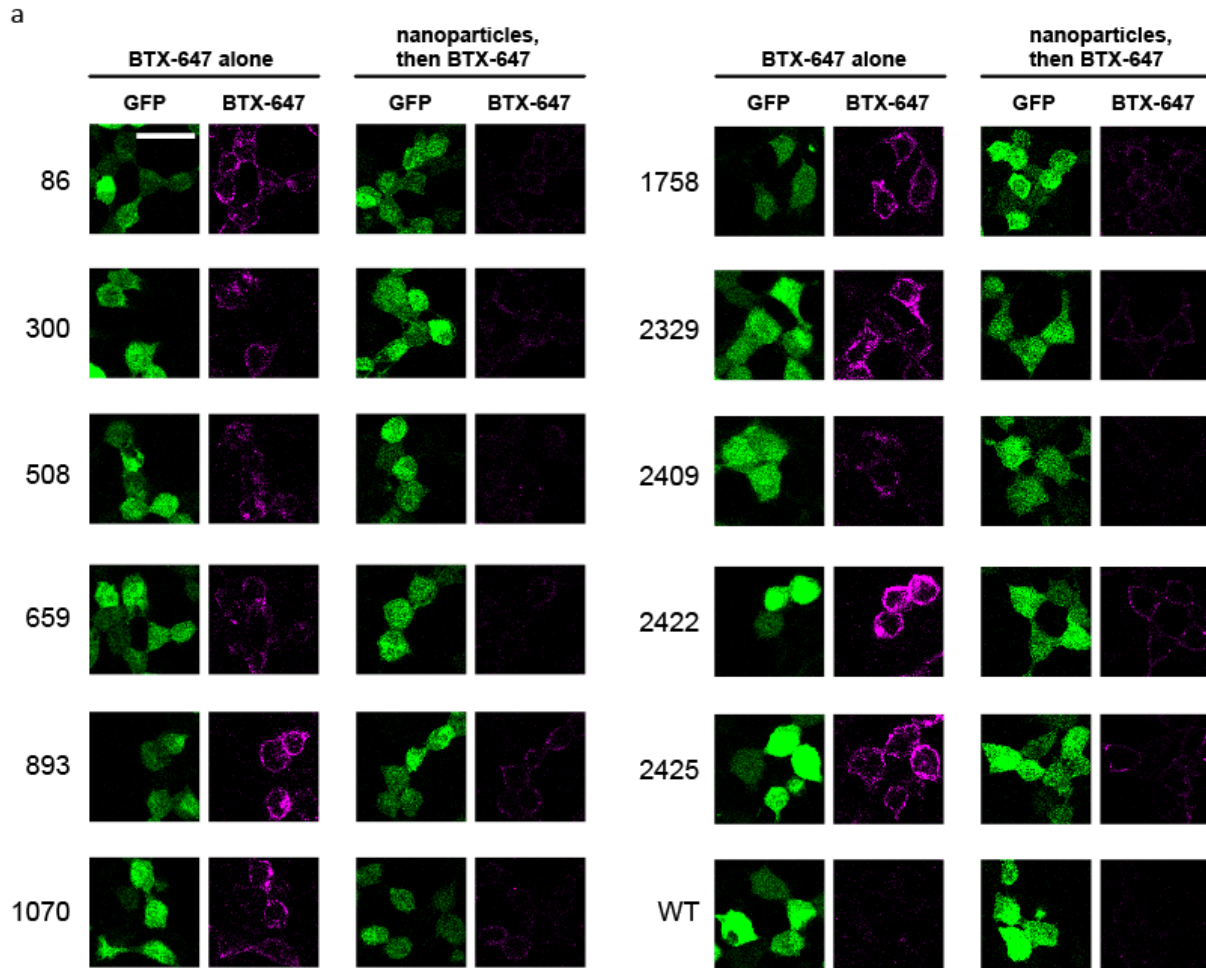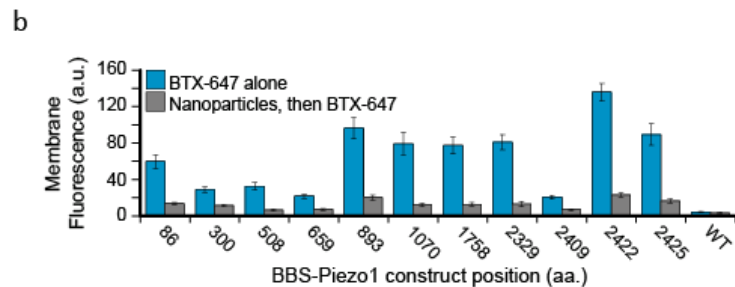

**Supplementary Figure 3. Efficiency of nanoparticle labeling.** (a.) Representative images of HEK293T cells expressing Piezo1-BBS constructs, live-labeled with either bungarotoxin (BTX)-Alexa Fluor 647 alone or first with nanoparticles, then followed by BTX-647 (green, GFP; magenta, BTX-647). (b.) Membrane fluorescence without (blue) and with (gray) prior nanoparticle labelling. Error bars are SEM. Scale bar is 30  $\mu$ m.

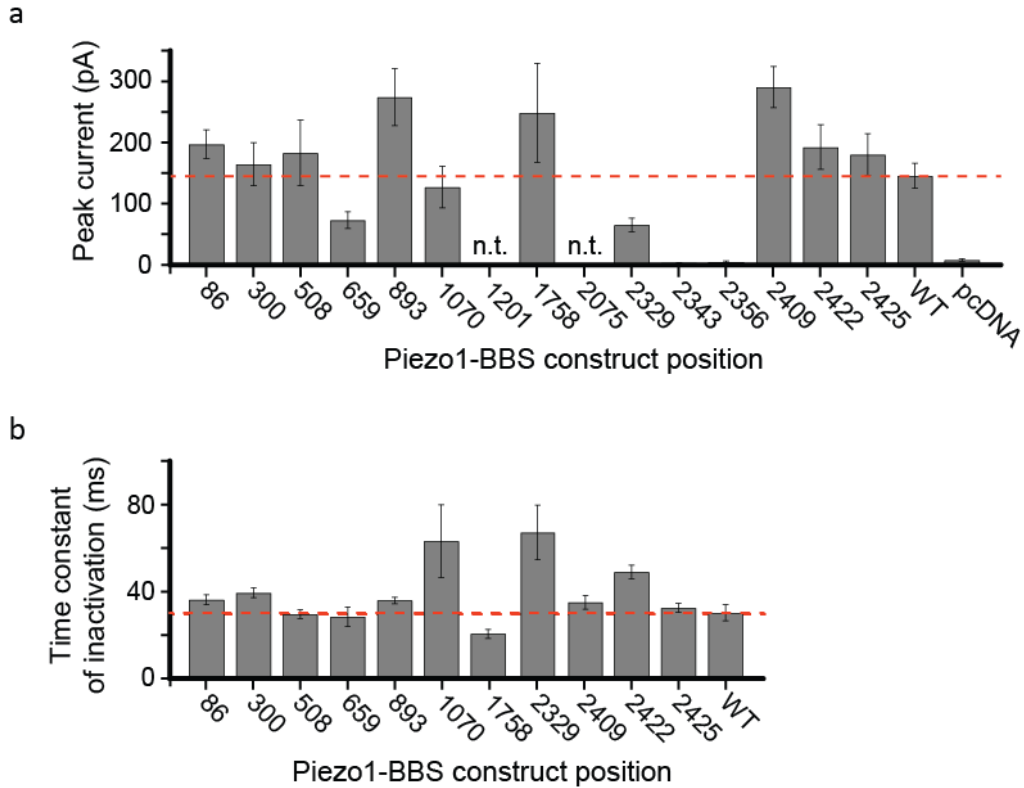

**Supplementary Figure 4. Piezo1-BBS construct functionality.** (a.) Average maximum current amplitudes during a -60 mmHg pressure step (-110 mmHg step for construct 1758) (n = 8 - 21 cells) (n.t., not tested; BBS-2343 and BBS-2356 significantly lower than WT,  $p < 0.0001$ , one-way ANOVA and NP multiple comparison) and (b.) Average time constants of inactivation (BBS-1070 and BBS-2329 significantly greater than WT,  $p < 0.01$ , one-way ANOVA and NP multiple comparison). Red dotted lines denotes averages for wild-type Piezo1. Error bars are SEM.

a

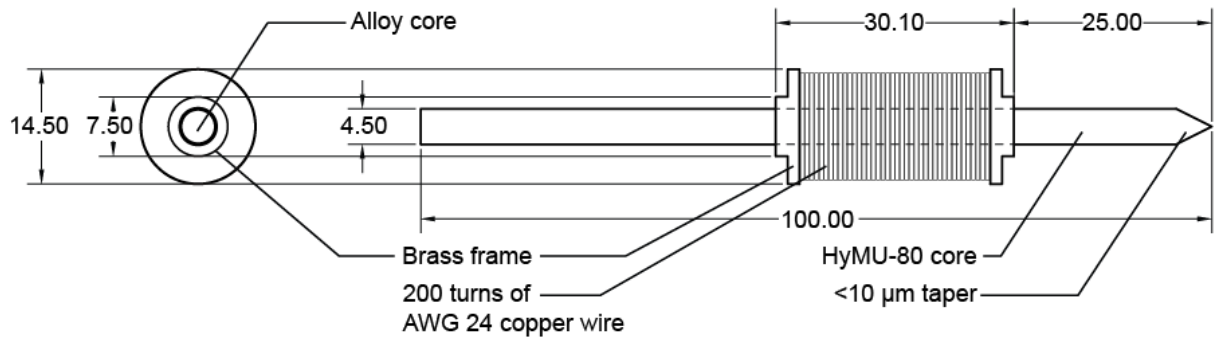

b

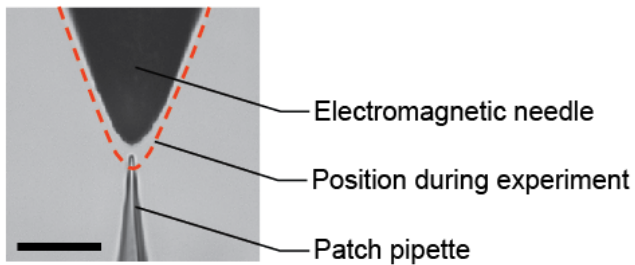

**Supplementary Figure 5. Design of electromagnetic needle.** (a) Design specifications for electromagnetic needle (units in mm). (b) Image of electromagnetic needle tip and patch pipette tip at 40x magnification. Dotted red line denotes position of needle above pipette tip during recording experiments. Scale bar is 50  $\mu\text{m}$ .

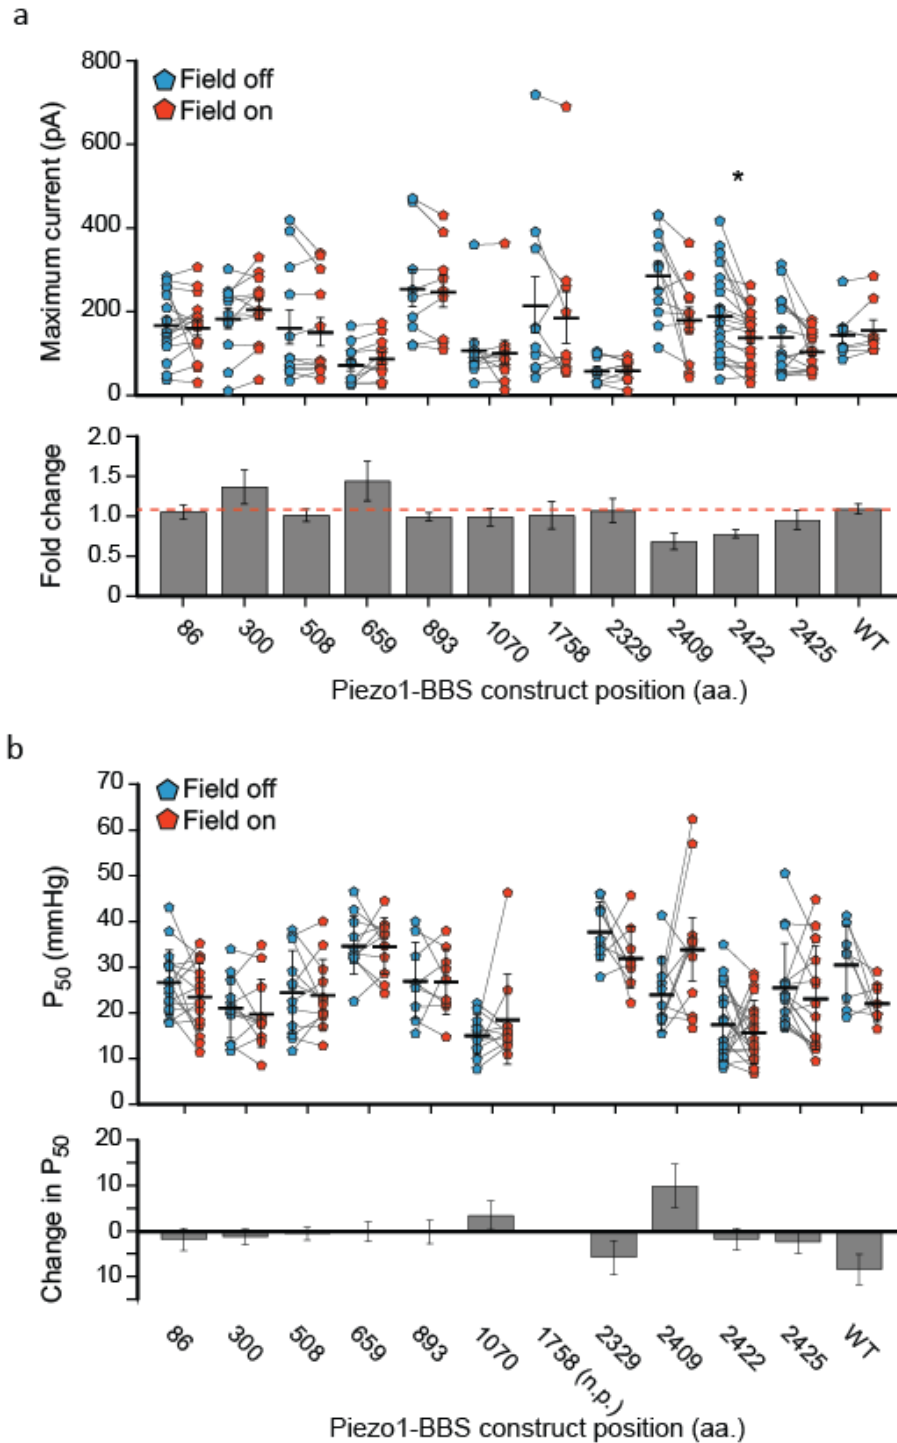

**Supplementary Figure 6. Effect of magnetic pulling on BBS-constructs.** (a.) Average maximum current amplitudes before and during a magnetic field stimulation (above) (\*,  $p < 0.01$ , paired t-test) and fold change in amplitude (below) ( $p > 0.01$  for all constructs, one-way ANOVA and Tukey's comparison) ( $n = 8 - 21$  cells) (b.) P<sub>50</sub> values before and during magnetic field stimulation (n.p., P<sub>50</sub> unavailable for BBS-1758,  $p > 0.01$  for all constructs, one-way ANOVA and Tukey's comparison). Error bars are SEM.

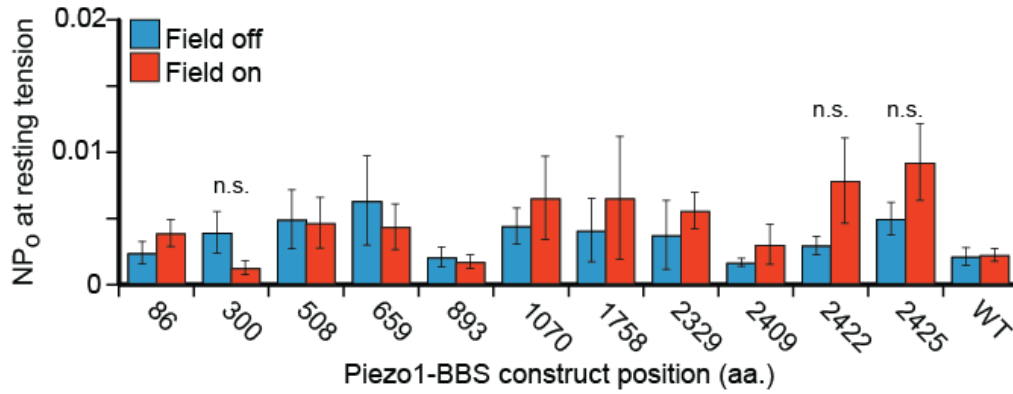

**Supplementary Figure 7.** Effect of magnetic field on Piezo1-BBS constructs at resting tension. NPo calculated from average current during a 4 second period at resting membrane tension (+5 mmHg) alone or in the presence of a magnetic field (n.s.  $p > 0.01$ , paired t-test). Error bars are SEM.

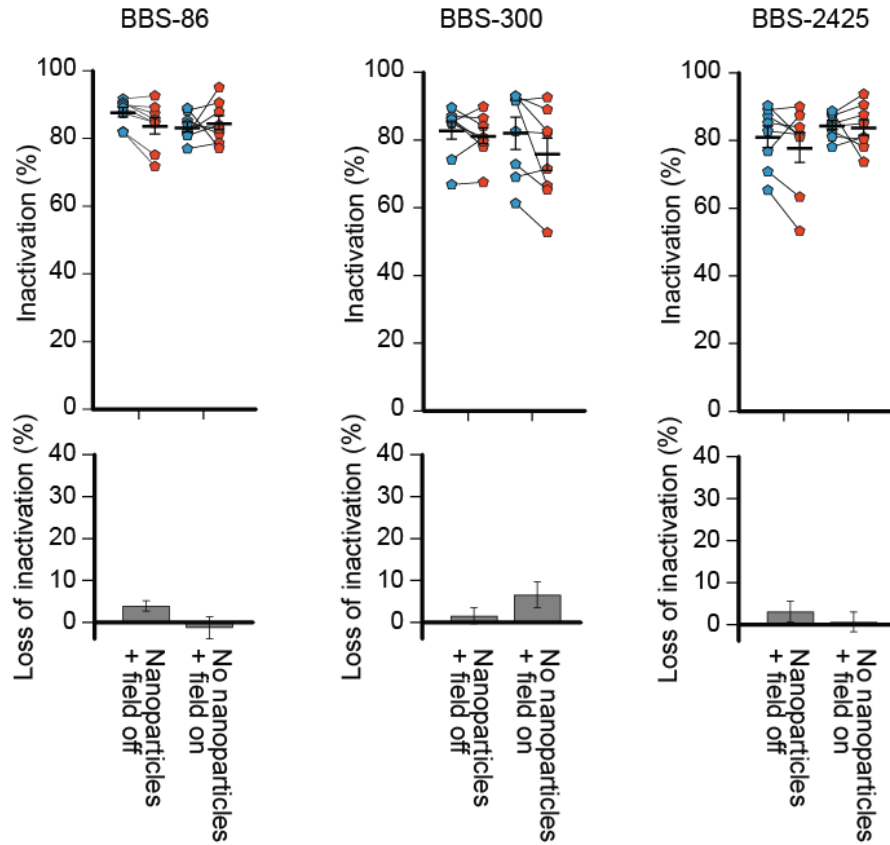

**Supplementary Figure 8. Effect of magnetic field and nanoparticle labeling separately.**

Inactivation of individual constructs BBS-86, BBS-300, and BBS-2425 with nanoparticle labeling alone (magnetic field off) or in the presence of a magnetic field alone (no nanoparticles) ( $p > 0.01$  for all comparisons, paired t-test). Error bars are SEM.



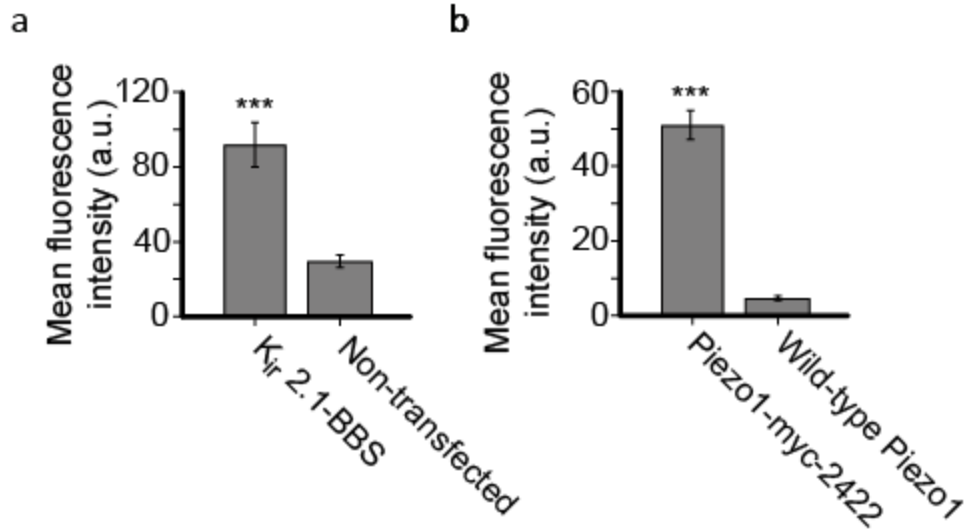

**Supplemental Fig. 9. Labeling specificity of tagged constructs.** (a) Quantification of mean membrane fluorescence intensity of Kir 2.1-BBS vs non-transfected cells (n = 12 cells each, \*\*\*p < 0.0001, unpaired t-test), (b) Piezo1-myc-2422 transfected cells vs wild-type Piezo1 (n = 13 cells each, \*\*\*p < 0.0001, unpaired t-test). Error bars are SEM.

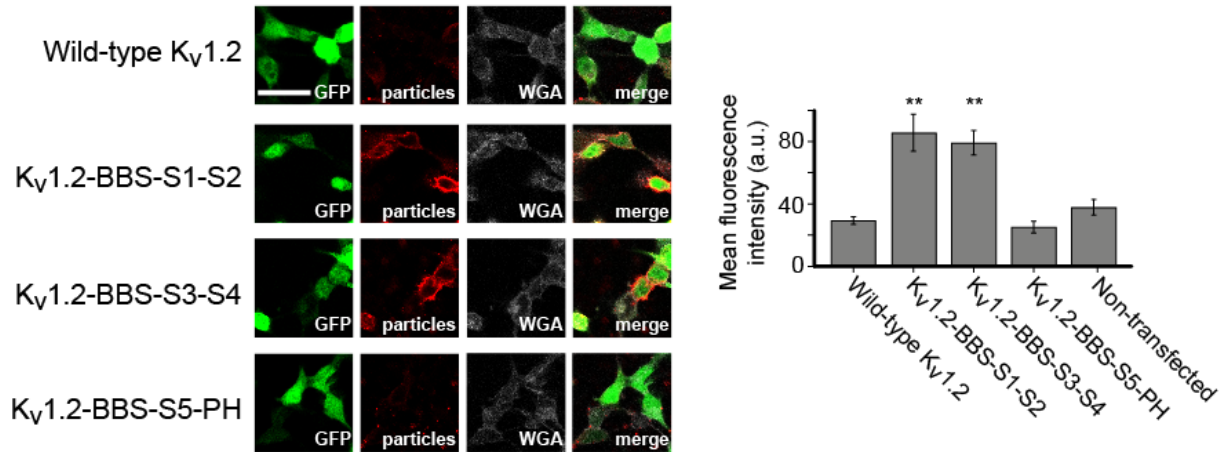

**Supplemental Fig. 10. Characterization of Kv1.2-BBS constructs.** (a) Representative fluorescent images of HEK293T cells immunostained against nanoparticles for Kv1.2-BBS constructs vs wild-type Kv1.2 (green, GFP; red, nanoparticles; gray, WGA) and quantification of mean fluorescence intensity along cell membrane compared against non-transfected cells (n = 15 cells each, 3 coverslips; \*\*p < 0.001, unpaired t-test). Error bars are SEM. Scale bar is 30  $\mu$ m.

| Mean $V_{1/2}$ (mV) for $K_v1.2$ and $K_v1.2$ -BBS constructs |                      |                        |                      |                      |                        |                      |
|---------------------------------------------------------------|----------------------|------------------------|----------------------|----------------------|------------------------|----------------------|
|                                                               | Field off            |                        |                      | Field on             |                        |                      |
|                                                               | <b>A</b><br>(0 mmHg) | <b>B</b><br>(-60 mmHg) | <b>C</b><br>(0 mmHg) | <b>D</b><br>(0 mmHg) | <b>E</b><br>(-60 mmHg) | <b>F</b><br>(0 mmHg) |
| <b>Wild-type <math>K_v1.2</math></b>                          | -24.4 ± 2.7          | -30.4 ± 1.9            | -29.3 ± 2.2          | -27.4 ± 2.9          | -34.3 ± 2.3            | -30.5 ± 2.6          |
| <b><math>K_v1.2</math>-BBS-S1-S2</b>                          | -33.8 ± 2.5          | -41.6 ± 3.8            | -35.7 ± 2.7          | -38.9 ± 3.8          | -45.8 ± 4.1            | -43.6 ± 4.8          |
| <b><math>K_v1.2</math>-BBS-S3-S4</b>                          | -39.7 ± 4.9          | -44.9 ± 5.5            | -41.9 ± 3.8          | -42.0 ± 4.7          | -46.8 ± 5.3            | -43.1 ± 3.4          |

**Supplementary Table 1. Voltage sensitivity of  $K_v1.2$ -BBS constructs.** Mean  $V_{1/2}$  values for wild-type  $K_v1.2$  and  $K_v1.2$ -BBS constructs ( $p > 0.01$  for comparisons between pairs A-D, B-E, and C-F; wild-type  $K_v1.2$ ,  $n = 8$ ;  $K_v1.2$ -BBS-S1-S2,  $n = 7$ ;  $K_v1.2$ -BBS-S3-S4,  $n = 5$ ; paired t-test.)

| <b>Construct</b> | <b>Forward primers (5' – 3')</b>                                                                                    | <b>Reverse primers (5' – 3')</b>                                                                                    |
|------------------|---------------------------------------------------------------------------------------------------------------------|---------------------------------------------------------------------------------------------------------------------|
| Piezo1-BBS-86    | <u>GCCTACACACCGTGCCTCACTGGA</u><br><u>GATACTACGAGAGCTCCCTGGAGC</u><br><u>CCTACCCTGACCTGGACCAGTTTC</u><br>TGGGAC     | <u>GTCCCAGAAACTGGTCCAGGTCAG</u><br><u>GGTAGGGCTCCAGGGAGCTCTCG</u><br><u>TAGTATCTCCAGTGAGGCACGGTG</u><br>TGTAGGC     |
| Piezo1-BBS-300   | <u>TCAAGAACTTCGTAGACCTCTGGA</u><br><u>GATACTACGAGAGCTCCCTGGAGC</u><br><u>CCTACCCTGACCCTAACTACTCCA</u><br>GCCCAA     | <u>TTGGGGCTGGAGTAGTTAGGGTCA</u><br><u>GGGTAGGGCTCCAGGGAGCTCTC</u><br><u>GTAGTATCTCCAGAGGTCTACGAA</u><br>GTTCTTGA    |
| Piezo1-BBS-508   | <u>TGGGCCCTGTCAGCCTGCACTGG</u><br><u>AGATACTACGAGAGCTCCCTGGAG</u><br><u>CCCTACCCTGACCAGTTGGGACTG</u><br>GAACACACA   | <u>TGTGTGTTCCAGTCCCAACTGGTC</u><br><u>AGGGTAGGGCTCCAGGGAGCTCT</u><br><u>CGTAGTATCTCCAGTGCAAGGCTGA</u><br>CAGGGCCCA  |
| Piezo1-BBS-659   | <u>CTTCCAGTTCAGGACTTCCCCTG</u><br><u>GAGATACTACGAGAGCTCCCTGGA</u><br><u>GCCCTACCCTGACACCTATTGGCG</u><br>CAACCTCAGC  | <u>CGTGAGGTTGCGCCAATAGGTGTC</u><br><u>AGGGTAGGGCTCCAGGGAGCTCT</u><br><u>CGTAGTATCTCCAGGGGAAGTCTT</u><br>GGAAGTGAAG  |
| Piezo1-BBS-893   | <u>CAACAATACCAACTTGCAGCCTTG</u><br><u>GAGATACTACGAGAGCTCCCTGGA</u><br><u>GCCCTACCCTGACTTGGAGATCAA</u><br>CCAGTCTTTG | <u>CAAAGACTGGTTGATCTCCAAGTC</u><br><u>AGGGTAGGGCTCCAGGGAGCTCT</u><br><u>CGTAGTATCTCCAAGGCTGCAAGT</u><br>TGGTATTGTTG |
| Piezo1-BBS-1070  | <u>TGGCGCTGGAGCAAGGCCATCTG</u><br><u>GAGATACTACGAGAGCTCCCTGGA</u><br><u>GCCCTACCCTGACCCCATGAATTC</u><br>CGCCCTCAT   | <u>ATGAGGGCGGAATTCATGGGGTC</u><br><u>AGGGTAGGGCTCCAGGGAGCTCT</u><br><u>CGTAGTATCTCCAGATGGCCTTGC</u><br>TCCAGCGCCA   |
| Piezo1-BBS-1201  | <u>CACTACCCTGCTGCAGAAGTGGAG</u><br><u>ATACTACGAGAGCTCCCTGGAGCC</u><br><u>CTACCCTGACGACACGCGAGCCC</u><br>AGCTCGTGC   | <u>GCACGAGCTGGGCTCGCGTGTCCG</u><br><u>TCAGGGTAGGGCTCCAGGGAGCT</u><br><u>CTCGTAGTATCTCCACTTCTGCAG</u><br>CAGGGTAGTG  |
| Piezo1-BBS-1758  | <u>CCCCTGGAACAGCTACGTTTGGAG</u><br><u>ATACTACGAGAGCTCCCTGGAGCC</u><br><u>CTACCCTGACGTGCTGCGGCGCT</u><br>ATGAGAAC    | <u>GTTCTCATAGCGCCGACGACGTC</u><br><u>AGGGTAGGGCTCCAGGGAGCTCT</u><br><u>CGTAGTATCTCCAAACGTAGCTGT</u><br>TCCAGGGG     |
| Piezo1-BBS-2075  | <u>CTGAGAGGATGTTTCAGCCAGTGG</u><br><u>GATACTACGAGAGCTCCCTGGAGC</u><br><u>CCTACCCTGACAATGCGGTGGCAC</u><br>AGCTGTG    | <u>CACAGCTGTGCCACCGCATTGTCA</u><br><u>GGGTAGGGCTCCAGGGAGCTCTC</u><br><u>GTAGTATCTCCACTGGCTGAACAT</u><br>CCTCTCAG    |
| Piezo1-BBS-2329  | <u>CCAAAGGGACCTGGCCAAGTGG</u><br><u>GATACTACGAGAGCTCCCTGGAGC</u><br><u>CCTACCCTGACGGTGGCACTGTG</u><br>GAGTATAC      | <u>GTATACTCCACAGTGCCACCGTCA</u><br><u>GGGTAGGGCTCCAGGGAGCTCTC</u><br><u>GTAGTATCTCCACTTGGCCAGGTC</u><br>CCTTTGG     |

|                              |                                                                                               |                                                                                                                          |
|------------------------------|-----------------------------------------------------------------------------------------------|--------------------------------------------------------------------------------------------------------------------------|
| Piezo1-BBS-2343              | <u>ATGAGAAGCACACCTTGGAGTGGAGATACTACGAGAGCTCCCTGGAGCCTACCCTGACCTGGCCCCAACA</u><br>GTACGGC      | <u>GCCGTA</u> <u>CTGTTGGGGGCCAGGTC</u><br><u>AGGGTAGGGCTCCAGGGAGCTCT</u><br><u>CGTAGTATCTCCACTCCAAGGTGT</u><br>GCTTCTCAT |
| Piezo1-BBS-2356              | <u>GCACGAAGGCAGCTGGCCCAATGGAGATACTACGAGAGCTCCCTGGAGGCCCTACCCTGACCTGCTCGAGG</u><br>GCAGACCTGAC | <u>GTCAGGTCTGCCCTCGAGCAGGT</u><br><u>CAGGGTAGGGCTCCAGGGAGCTC</u><br><u>TCGTAGTATCTCCATTGGGCCAGC</u><br>TGCCTTCGTGC       |
| Piezo1-BBS-2409              | <u>CAGCTGCGGAGGGAGCAATGGAGATACTACGAGAGCTCCCTGGAGCCCTACCCTGACGTGGGCACAGGGG</u><br>CCTCTG       | <u>CAGAGGCCCTGTGCCACGTCAGGGTAGGGCTCCAGGGAGCTCTC</u><br><u>GTAGTATCTCCATTGCTCCCTCCG</u><br>CAGCTG                         |
| Piezo1-BBS-2422              | <u>GGAGCAAGCGGGACCAAGTGGAGATACTACGAGAGCTCCCTGGAGCCCTACCCTGACGCCTCCGACTTCC</u><br>TCGAGTGG     | <u>CCACTCGAGGAAGTCGGAGGCGTCAGGGTAGGGCTCCAGGGAGCTC</u><br><u>TCGTAGTATCTCCACTTGGTGCCC</u><br>GCTTGCTCC                    |
| Piezo1-BBS-2425              | <u>GGCACCAAGGCCTCCGACTGGAGATACTACGAGAGCTCCCTGGAGCCCTACCCTGACTTCTCGAGTGGTG</u><br>GGTCATC      | <u>GATGACCCACCACTCGAGGAAGTCAGGGTAGGGCTCCAGGGAGCTCT</u><br><u>CGTAGTATCTCCAGTCGGAGGCCT</u><br>TGGTGCC                     |
| K <sub>ir</sub> 2.1-BBS      | <u>GATACTTCTAAAGTGAGCAAATGGAGATACTACGAGAGCTCCCTGGAGCCCTACCCTGACGCATGCGTGTGC</u><br>GAGGTCAAC  | <u>GTTGACCTCCGACACGCATGCGTCAGGGTAGGGCTCCAGGGAGCTCT</u><br><u>CGTAGTATCTCCATTTGCTCACTTT</u><br>AGAAGTATC                  |
| K <sub>v</sub> 1.2-BBS-S1-S2 | <u>GAATGAAGACATGCATGGTTGGAGATACTACGAGAGCTCCCTGGAGCCCTACCCTGACAGTGGGGTGACCTT</u><br>CCAC       | <u>GTGGAAGGTCACCCCACTGTCAGGGTAGGGCTCCAGGGAGCTCTCG</u><br><u>TAGTATCTCCAACCATGCATGTCTT</u><br>CATTCC                      |
| K <sub>v</sub> 1.2-BBS-S3-S4 | <u>GAGGACGCTCAGCAAGGCTGGAGATACTACGAGAGCTCCCTGGAGCCCTACCCTGACCAGCAGGCCATGTC</u><br>ACTG        | <u>CAGTGACATGGCCTGCTGGTCAGGGTAGGGCTCCAGGGAGCTCTCG</u><br><u>TAGTATCTCCAGCCTTGCTGAGCG</u><br>TCCTC                        |
| K <sub>v</sub> 1.2-BBS-S5-PH | <u>GCTGTGTATTTTGCAGAGTGGAGATACTACGAGAGCTCCCTGGAGCCCCTACCCTGACGCCGATGAGCGAGA</u><br>GTCC       | <u>GGACTCTCGCTCATCGGCGTCAGGGTAGGGCTCCAGGGAGCTCTCG</u><br><u>TAGTATCTCCACTCTGCAAAATACA</u><br>CAGC                        |
| Piezo1-myc-2422              | <u>GGAGCAAGCGGGACCAAGGAGCAGAAACTCATCTCTGAAGAGGATCTGGCCTCCGACTTCTCGAGTGG</u>                   | <u>CCACTCGAGGAAGTCGGAGGCCAGATCCTCTTCAGAGATGAGTTTCT</u><br><u>GCTCCTTGGTGCCCGCTTGCTCC</u>                                 |

**Supplementary Table 2. Primer list.** Complementary primer sets used to insert bungarotoxin binding sequence or myc tag (underlined).
